# Supplementary material for: The Long Non-Coding RNA SNHG12 as a Mediator of Carboplatin Resistance in Ovarian Cancer via Epigenetic Mechanisms
Source: MDPI journal article supplement (doi:10.3390/cancers14071664), 2022-03-25
Supplement: s1 [file s1]

**Table S1.** Mutational status of four cancer driver genes (*TP53*, *BRCA1*, *BRCA2*, and *KRAS*) and carboplatin response of selected cell lines and its carboplatin-resistant counterparts.

| Cell line | Mutation status                |                                                   |             | Carboplatin IC <sub>50</sub> (μM) |
|-----------|--------------------------------|---------------------------------------------------|-------------|-----------------------------------|
|           | <i>TP53</i>                    | <i>BRCA1/2</i>                                    | <i>KRAS</i> |                                   |
| IGROV1    | p.Y126C                        | <i>BRCA1</i> p.K654fs*47<br><i>BRCA2</i> p.P3150T | wt          | 14.0 ± 1.1                        |
| IGROV1-R1 | p.Y126C                        | <i>BRCA1</i> p.K654fs*47<br><i>BRCA2</i> p.P3150T | wt          | 44.4 ± 8.2                        |
| OVCAR3    | p.R248Q                        | wt                                                | wt          | 4.8 ± 2.1                         |
| OVCAR3-R1 | p.R248Q                        | wt                                                | wt          | 28.6 ± 2.6                        |
| OVCAR3-R2 | p.R248Q                        | wt                                                | wt          | 31.4 ± 2.1                        |
| OVCAR4    | p.L130V                        | <i>BRCA2</i> p.P2505L                             | wt          | 8.8 ± 4.2                         |
| OVCAR5    | wt                             | wt                                                | p.Gly12Val  | 17.2 ± 4.0                        |
| OVCAR5-R1 | wt                             | wt                                                | p.Gly12Val  | 47.4 ± 7.4                        |
| OVCAR8    | c.376-1G>A<br>(splice variant) | wt                                                | wt          | 33.0 ± 2.6                        |
| Ovc316    | -                              | wt                                                | wt          | 77.8 ± 2.8                        |

R1 and R2 carboplatin-resistant derived counterparts;  
wt: wild type, no predicted deleterious mutation identified.

**Table S2.** Clinical and pathological features of 39 patients with high-grade serous ovarian carcinoma included in this study.

| Variable                                  | Cases<br>(N=39)     |
|-------------------------------------------|---------------------|
| <b>Age at diagnosis (years)</b>           |                     |
| Mean ( $\pm$ Std. Deviation)              | 69.4 $\pm$ 9.4      |
| Median                                    | 69.1                |
| Range                                     | min 46 - max 83     |
| <b>FIGO stage</b>                         |                     |
| III                                       | 31                  |
| IV                                        | 8                   |
| <b>CA-125 baseline level, U/L*</b>        |                     |
| Median                                    | 803                 |
| Range                                     | min 179 - max 17096 |
| <b>Progression-free survival (months)</b> |                     |
| 0-6                                       | 11                  |
| 7-11                                      | 9                   |
| >12                                       | 19                  |
| <b>Overall survival (months)</b>          |                     |
| <12                                       | 12                  |
| >12                                       | 27                  |

(\*) data available on 22 out of 39 cases.

**Table S3.** Pathway enrichment analysis of differentially expressed genes between carboplatin-sensitive and carboplatin resistant OC derived cells.

| Pathway name                                                                                    | Entities    |              |                 |                 | Reactions  |                 |
|-------------------------------------------------------------------------------------------------|-------------|--------------|-----------------|-----------------|------------|-----------------|
|                                                                                                 | found       | ratio        | p-value         | FDR*            | found      | ratio           |
| <b>Up-regulated genes</b>                                                                       |             |              |                 |                 |            |                 |
| Glutathione conjugation                                                                         | 4/67        | 0.006        | 0.003           | 0.268           | 1/14       | 0.001           |
| Activation of PUMA and translocation to mitochondria                                            | 2/10        | 6.97e-04     | 0.003           | 0.268           | 5/5        | 3.78e-04        |
| Formyl peptide receptors bind formyl peptides and many other ligands                            | 2/11        | 7.47e-04     | 0.004           | 0.268           | 2/3        | 2.27e-04        |
| Signaling by TGFB family members                                                                | 4/114       | 0.008        | 0.016           | 0.47            | 11/107     | 0.008           |
| FOXO-mediated transcription of cell death genes                                                 | 2/23        | 0/002        | 0.016           | 0.47            | 2/15       | 0.001           |
| TP53 regulates transcription of genes involved in cytochrome C release                          | 2/33        | 0.002        | 0.032           | 0.47            | 2/25       | 0.002           |
| Antagonism of activin by follistatin                                                            | 1/4         | 2.72e-04     | 0.033           | 0.47            | 2/2        | 1.51e-04        |
| TGFBRI LED mutants in cancer                                                                    | 1/4         | 2.72e-04     | 0.033           | 0.47            | 1/1        | 7.56e-05        |
| Signaling by TGF-beta receptor complex                                                          | 3/85        | 0.006        | 0.035           | 0.47            | 4/82       | 0.006           |
| Activation of BH3 only proteins                                                                 | 2/36        | 0.002        | 0.037           | 0.47            | 5/19       | 0.001           |
| SMAD2/SMAD3:SMAD4 heterotrimer regulates transcription                                          | 2/39        | 0.003        | 0.043           | 0.47            | 1/17       | 0.001           |
| BMAL1:CLOCK, NPAS2 activates circadian gene expression                                          | 2/42        | 0.003        | 0.049           | 0.47            | 2/20       | 0.002           |
| <b>Down-regulated genes</b>                                                                     |             |              |                 |                 |            |                 |
| RUNX1 regulates genes involved in megakaryocyte differentiation and platelets function          | 11/73       | 0.005        | 1.13e-07        | 6.70e-05        | 21/33      | 0.002           |
| RNA Polymerase I promoter opening                                                               | 8/34        | 0.002        | 1.43e-07        | 6.70e-05        | 2/2        | 1.51e-04        |
| IGF1R signaling cascade                                                                         | 10/72       | 0.005        | 4.92e-07        | 1.30e-04        | 9/17       | 0.001           |
| Activated PEN1 stimulates transcription of AR (androgen receptor) regulated genes KLK2 and KLK3 | 8/49        | 0.003        | 2.15e-06        | 4.02e-04        | 9/11       | 8.32e-04        |
| <b>DNA methylation</b>                                                                          | <b>7/36</b> | <b>0.002</b> | <b>3.04e-06</b> | <b>4.74e-04</b> | <b>7/7</b> | <b>5.29e-04</b> |
| NoRC negatively regulates rRNA expression                                                       | 9/80        | 0.005        | 9.89e-05        | 0.001           | 5/7        | 5.29e-04        |
| <b>PRC2 methylates histones and DNA</b>                                                         | <b>7/44</b> | <b>0.003</b> | <b>1.11e-05</b> | <b>0.001</b>    | <b>4/4</b> | <b>3.02e-04</b> |
| SIRT1 negatively regulates rRNA expression                                                      | 7/45        | 0.003        | 1.28e-05        | 0.001           | 3/5        | 3.78e-04        |
| Unfolded protein response (UPR)                                                                 | 12/15<br>5  | 0.011        | 1.44e-05        | 0.001           | 13/94      | 0.007           |
| RNA Polymerase I promoter escape                                                                | 8/64        | 0.004        | 1.47e-05        | 0.001           | 2/2        | 1.51e-04        |
| Signaling by FGFR                                                                               | 10/10<br>7  | 0.007        | 1.56e-05        | 0.001           | 777/142    | 0.011           |
| ERCC2 (CSB) and EHMT2 (G9a) positively regulate rRNA expression                                 | 7/48        | 0.003        | 1.92e-05        | 0.001           | 2/4        | 3.02e-04        |

**Table S4.** Differentially expressed lncRNAs and overlapping differentially methylated positions in ovarian cancer cell lines relative to its carboplatin-resistant counterparts.

| lncRNA            | Chr | Nucleotide position |           | Gene expression analysis |          | DNA methylation analysis |               |         |
|-------------------|-----|---------------------|-----------|--------------------------|----------|--------------------------|---------------|---------|
|                   |     | Start               | End       | log FC                   | p-value  | Probe ID                 | $\Delta\beta$ | p-value |
| <i>SNHG12</i>     | 1   | 28578538            | 28583132  | 0.41                     | 0.010    | cg08625918               | -0.08         | 0.03    |
| <i>LINC01781</i>  | 1   | 80535755            | 80646791  | -1.65                    | 0.003    | cg22327746               | 0.24          | 0.03    |
| <i>AC010894.3</i> | 2   | 174547141           | 174776720 | -1.15                    | 0.047    | cg17095939               | 0.16          | 0.02    |
|                   |     |                     |           |                          |          | cg14797460               | 0.04          | 0.00    |
|                   |     |                     |           |                          |          | cg08213000               | 0.17          | 0.01    |
|                   |     |                     |           |                          |          | cg15174367               | 0.05          | 0.03    |
| <i>LINC01811</i>  | 3   | 33956972            | 34677247  | 1.48                     | 0.004    | cg17661563               | 0.36          | 0.05    |
| <i>AC025470.2</i> | 5   | 57395060            | 57534504  | 1.49                     | 0.002    | cg00325378               | 0.24          | 0.04    |
| <i>LINC01277</i>  | 6   | 142966293           | 143059682 | 0.75                     | 0.009    | cg19979228               | 0.22          | 0.03    |
|                   |     |                     |           |                          |          | cg23117546               | 0.35          | 0.02    |
|                   |     |                     |           |                          |          | cg03616157               | 0.20          | 0.01    |
| <i>EMX2OS</i>     | 10  | 117473215           | 117545068 | -0.54                    | 0.034    | cg04556008               | 0.39          | 0.03    |
| <i>AP002807.1</i> | 11  | 68050740            | 68053762  | 0.90                     | 0.001    | cg00387390               | 0.12          | 0.04    |
|                   |     |                     |           |                          |          | cg14774134               | 0.07          | 0.00    |
|                   |     |                     |           |                          |          | cg15085109               | 0.08          | 0.02    |
| <i>AP002518.2</i> | 11  | 114210616           | 114356571 | 0.81                     | 0.047    | cg03409036               | 0.11          | 0.04    |
| <i>AC244502.1</i> | 14  | 22197446            | 22482959  | 1.09                     | 0.009    | cg21875948               | 0.37          | 0.03    |
|                   |     |                     |           |                          |          | cg10268229               | 0.21          | 0.01    |
| <i>AC087612.1</i> | 15  | 63091085            | 63110589  | 4.06                     | 8.93e-12 | cg06828657               | 0.17          | 0.02    |

Chr: chromosome; logFC: log Fold-Change
