# Supplementary material for: The Long Non-Coding RNA SNHG12 as a Mediator of Carboplatin Resistance in Ovarian Cancer via Epigenetic Mechanisms
Source: Cancers (Basel). 2022 Mar 25;14(7):1664. doi: 10.3390/cancers14071664 (PMC8996842; doi:10.3390/cancers14071664)
Supplement: Supplementary file 1 [file cancers-14-01664-s001.zip › Supplementary Table S5.xlsx]

## Sheet: Planilha1
Supplementary Table SX. Differentially expressed genes and differentially methylated positions associated with platinum response.
Gene ID	Gene Symbol	Probe ID	Carboplatin-resistant OC cell lines
			Hypermethylated	Hypomethylated	Upregulated	Downregulated
ENSG00000118777	ABCG2	cg16974187	X		X
ENSG00000140526	ABHD2					X
ENSG00000137845	ADAM10					X
ENSG00000168615	ADAM9					X
ENSG00000156709	AIFM1					X
ENSG00000196139	AKR1C3				X
ENSG00000105221	AKT2	cg22169301	X			X
ENSG00000159461	AMFR					X
ENSG00000148677	ANKRD1				X
ENSG00000138772	ANXA3				X
ENSG00000100823	APEX1					X
ENSG00000167580	AQP2	cg06144990	X			X
ENSG00000167580	AQP2	cg09577511	X			X
ENSG00000167580	AQP2	cg22049450	X			X
ENSG00000143437	ARNT					X
ENSG00000115966	ATF2	cg15003124		X		X
ENSG00000162772	ATF3	cg03253433	X		X
ENSG00000149311	ATM					X
ENSG00000058063	ATP11B					X
ENSG00000123191	ATP7B					X
ENSG00000167601	AXL	cg10564498		X	X
ENSG00000167601	AXL	cg03247049		X	X
ENSG00000167601	AXL	cg12722469		X	X
ENSG00000167601	AXL	cg19848291		X	X
ENSG00000167601	AXL	cg14892768		X	X
ENSG00000167601	AXL	cg27030540	X		X
ENSG00000138376	BARD1	cg13817798	X			X
ENSG00000138376	BARD1	cg07836306		X		X
ENSG00000105327	BBC3				X
ENSG00000171552	BCL2L1				X
ENSG00000166681	BEX3					X
ENSG00000100290	BIK				X
ENSG00000197299	BLM	cg05755646	X			X
ENSG00000107779	BMPR1A					X
ENSG00000139618	BRCA2					X
ENSG00000172270	BSG					X
ENSG00000126247	CAPNS1					X
ENSG00000108691	CCL2				X
ENSG00000145386	CCNA2					X
ENSG00000118816	CCNI					X
ENSG00000272398	CD24					X
ENSG00000070831	CDC42	cg18628801	X			X
ENSG00000097046	CDC7					X
ENSG00000163814	CDCP1	cg26792325	X		X
ENSG00000135446	CDK4					X
ENSG00000124762	CDKN1A				X
ENSG00000111276	CDKN1B					X
ENSG00000123080	CDKN2C					X
ENSG00000149554	CHEK1					X
ENSG00000108821	COL1A1	cg08681473	X		X
ENSG00000108821	COL1A1	cg00638021	X		X
ENSG00000108821	COL1A1	cg21847118	X		X
ENSG00000109846	CRYAB	cg26296901	X		X
ENSG00000184371	CSF1				X
ENSG00000182578	CSF1R	cg14700085	X		X
ENSG00000139842	CUL4A	cg14896830	X			X
ENSG00000169429	CXCL8				X
ENSG00000121966	CXCR4				X
ENSG00000167657	DAPK3				X
ENSG00000198924	DCLRE1A					X
ENSG00000118655	DCLRE1B					X
ENSG00000134574	DDB2				X
ENSG00000228716	DHFR					X
ENSG00000100697	DICER1	cg17491589		X		X
ENSG00000100697	DICER1	cg01049870	X			X
ENSG00000050165	DKK3	cg20345286	X		X
ENSG00000050165	DKK3	cg21346241	X		X
ENSG00000136048	DRAM1				X
ENSG00000161202	DVL3				X
ENSG00000088986	DYNLL1					X
ENSG00000007968	E2F2					X
ENSG00000165891	E2F7	cg01164789	X			X
ENSG00000151617	EDNRA				X
ENSG00000110047	EHD1	cg20748350	X		X
ENSG00000110047	EHD1	cg27520974	X		X
ENSG00000107581	EIF3A					X
ENSG00000130811	EIF3G					X
ENSG00000187840	EIF4EBP1					X
ENSG00000170370	EMX2					X
ENSG00000106991	ENG	cg05000435	X		X
ENSG00000074800	ENO1					X
ENSG00000142627	EPHA2				X
ENSG00000065361	ERBB3					X
ENSG00000178568	ERBB4					X
ENSG00000012061	ERCC1					X
ENSG00000049167	ERCC8					X
ENSG00000134954	ETS1	cg03702171	X		X
ENSG00000134954	ETS1	cg23989409	X		X
ENSG00000134954	ETS1	cg09915500	X		X
ENSG00000106462	EZH2	cg15228889		X		X
ENSG00000158169	FANCC	cg05040464	X			X
ENSG00000187790	FANCM					X
ENSG00000026103	FAS				X
ENSG00000138685	FGF2				X
ENSG00000066468	FGFR2	cg13437682	X			X
ENSG00000175592	FOSL1				X
ENSG00000163430	FSTL1	cg07352158		X	X
ENSG00000177283	FZD8				X
ENSG00000154727	GABPA					X
ENSG00000116717	GADD45A				X
ENSG00000113384	GOLPH3	cg13518591	X			X
ENSG00000143457	GOLPH3L					X
ENSG00000013588	GPRC5A				X
ENSG00000104687	GSR					X
ENSG00000049239	H6PD					X
ENSG00000113070	HBEGF	cg18722504	X		X
ENSG00000103145	HCFC1R1					X
ENSG00000116478	HDAC1					X
ENSG00000164683	HEY1					X
ENSG00000177374	HIC1	cg01070078		X	X
ENSG00000177374	HIC1	cg25432975		X	X
ENSG00000177374	HIC1	cg02376827	X		X
ENSG00000177374	HIC1	cg21854952	X		X
ENSG00000177374	HIC1	cg23621097	X		X
ENSG00000189403	HMGB1					X
ENSG00000164104	HMGB2					X
ENSG00000106031	HOXA13	cg01363170	X			X
ENSG00000080824	HSP90AA1					X
ENSG00000096384	HSP90AB1					X
ENSG00000204389	HSPA1A					X
ENSG00000044574	HSPA5					X
ENSG00000144381	HSPD1					X
ENSG00000090339	ICAM1				X
ENSG00000136231	IGF2BP3					X
ENSG00000197081	IGF2R	cg27588577	X		X
ENSG00000263528	IKBKE				X
ENSG00000115008	IL1A	cg20801163	X		X
ENSG00000125538	IL1B				X
ENSG00000104432	IL7	cg15817287	X		X
ENSG00000104432	IL7	cg13896190	X		X
ENSG00000104432	IL7	cg09569196	X		X
ENSG00000166333	ILK				X
ENSG00000177606	JUN				X
ENSG00000172977	KAT5					X
ENSG00000112984	KIF20A					X
ENSG00000157404	KIT				X
ENSG00000005156	LIG3					X
ENSG00000123384	LRP1	cg09235426	X		X
ENSG00000123384	LRP1	cg12385849	X		X
ENSG00000123384	LRP1	cg00566930	X		X
ENSG00000123384	LRP1	cg13236858	X		X
ENSG00000123384	LRP1	cg09840824	X		X
ENSG00000136802	LRRC8A				X
ENSG00000171492	LRRC8D	cg22365015	X			X
ENSG00000116670	MAD2L2					X
ENSG00000197063	MAFG				X
ENSG00000172175	MALT1				X
ENSG00000101460	MAP1LC3A	cg13040610	X		X
ENSG00000034152	MAP2K3	cg18881501		X	X
ENSG00000156711	MAPK13	cg00095018	X		X
ENSG00000152601	MBNL1	cg10655534		X		X
ENSG00000170430	MGMT	cg04436810	X			X
ENSG00000170430	MGMT	cg27000233	X			X
ENSG00000196549	MME				X
ENSG00000123342	MMP19				X
ENSG00000137674	MMP20				X
ENSG00000020922	MRE11					X
ENSG00000095002	MSH2					X
ENSG00000113318	MSH3	cg16158782	X			X
ENSG00000163132	MSX1				X
ENSG00000147649	MTDH					X
ENSG00000172936	MYD88				X
ENSG00000067798	NAV3	cg04498650	X		X
ENSG00000067798	NAV3	cg09045073	X		X
ENSG00000067798	NAV3	cg07664061	X		X
ENSG00000067798	NAV3	cg20297402	X		X
ENSG00000104320	NBN					X
ENSG00000049759	NEDD4L				X
ENSG00000154328	NEIL2	cg20207567		X		X
ENSG00000077150	NFKB2				X
ENSG00000089250	NOS1					X
ENSG00000007171	NOS2				X
ENSG00000255346	NOX5					X
ENSG00000181163	NPM1					X
ENSG00000181019	NQO1					X
ENSG00000123358	NR4A1	cg10636925	X		X
ENSG00000123358	NR4A1	cg20560869	X		X
ENSG00000123358	NR4A1	cg07748032	X		X
ENSG00000213281	NRAS					X
ENSG00000149269	PAK1					X
ENSG00000116288	PARK7					X
ENSG00000143799	PARP1					X
ENSG00000185630	PBX1	cg25326727		X		X
ENSG00000163346	PBXIP1	cg16318349	X		X
ENSG00000163346	PBXIP1	cg02424687	X		X
ENSG00000163346	PBXIP1	cg15705054	X		X
ENSG00000132646	PCNA					X
ENSG00000170962	PDGFD	cg19086836		X		X
ENSG00000113721	PDGFRB	cg19239531	X		X
ENSG00000113721	PDGFRB	cg04841196	X		X
ENSG00000167004	PDIA3	cg23917913	X			X
ENSG00000162734	PEA15				X
ENSG00000101856	PGRMC1					X
ENSG00000092621	PHGDH	cg04139379		X		X
ENSG00000051382	PIK3CB					X
ENSG00000145675	PIK3R1					X
ENSG00000158828	PINK1	cg25469870	X		X
ENSG00000158828	PINK1	cg05473993	X		X
ENSG00000158828	PINK1	cg15246767	X		X
ENSG00000145632	PLK2				X
ENSG00000141682	PMAIP1				X
ENSG00000140464	PML	cg13389299	X		X
ENSG00000122512	PMS2	cg19570749	X			X
ENSG00000106628	POLD2					X
ENSG00000077514	POLD3	cg20569356	X			X
ENSG00000148229	POLE3					X
ENSG00000165672	PRDX3					X
ENSG00000132356	PRKAA1					X
ENSG00000108946	PRKAR1A	cg15908654	X			X
ENSG00000108946	PRKAR1A	cg17147106	X			X
ENSG00000154229	PRKCA					X
ENSG00000253729	PRKDC					X
ENSG00000204983	PRSS1					X
ENSG00000171862	PTEN					X
ENSG00000050628	PTGER3	cg17888090	X		X
ENSG00000050628	PTGER3	cg12316870	X		X
ENSG00000050628	PTGER3	cg26672954	X		X
ENSG00000050628	PTGER3	cg11421620	X		X
ENSG00000050628	PTGER3	cg09280427	X		X
ENSG00000050628	PTGER3	cg21421073	X		X
ENSG00000050628	PTGER3	cg16823292	X		X
ENSG00000050628	PTGER3	cg08462944	X		X
ENSG00000073756	PTGS2	cg07422329	X		X
ENSG00000051180	RAD51					X
ENSG00000068028	RASSF1				X
ENSG00000101773	RBBP8					X
ENSG00000102317	RBM3					X
ENSG00000173039	RELA	cg08128650	X		X
ENSG00000104856	RELB				X
ENSG00000049541	RFC2	cg23560257	X			X
ENSG00000049541	RFC2	cg15076481	X			X
ENSG00000148908	RGS10	cg16585214	X			X
ENSG00000080345	RIF1	cg18972225		X		X
ENSG00000080345	RIF1	cg25953970		X		X
ENSG00000169071	ROR2				X
ENSG00000132383	RPA1					X
ENSG00000117748	RPA2					X
ENSG00000130255	RPL36	cg15440370		X		X
ENSG00000145592	RPL37	cg12904718		X		X
ENSG00000008988	RPS20					X
ENSG00000177189	RPS6KA3					X
ENSG00000171863	RPS7					X
ENSG00000163220	S100A9				X
ENSG00000173611	SCAI					X
ENSG00000143252	SDHC					X
ENSG00000106366	SERPINE1				X
ENSG00000160691	SHC1					X
ENSG00000126778	SIX1					X
ENSG00000112499	SLC22A2				X
ENSG00000146477	SLC22A3				X
ENSG00000100075	SLC25A1					X
ENSG00000168003	SLC3A2				X
ENSG00000103257	SLC7A5				X
ENSG00000141646	SMAD4					X
ENSG00000128602	SMO					X
ENSG00000166311	SMPD1				X
ENSG00000161011	SQSTM1				X
ENSG00000197122	SRC	cg10842403	X		X
ENSG00000197122	SRC	cg14331199	X		X
ENSG00000197122	SRC	cg21593255	X		X
ENSG00000197122	SRC	cg12361951	X		X
ENSG00000197122	SRC	cg24034752	X		X
ENSG00000197122	SRC	cg13895781	X		X
ENSG00000197122	SRC	cg26701500	X		X
ENSG00000197122	SRC	cg23298034	X		X
ENSG00000197122	SRC	cg12435241	X		X
ENSG00000135250	SRPK2	cg05501546		X		X
ENSG00000135250	SRPK2	cg09232203		X		X
ENSG00000135250	SRPK2	cg19203911		X		X
ENSG00000135250	SRPK2	cg21951543		X		X
ENSG00000135250	SRPK2	cg15605257		X		X
ENSG00000135250	SRPK2	cg13457392		X		X
ENSG00000135250	SRPK2	cg08009697	X			X
ENSG00000135250	SRPK2	cg21261709		X		X
ENSG00000135250	SRPK2	cg11051391		X		X
ENSG00000135250	SRPK2	cg06393874		X		X
ENSG00000135250	SRPK2	cg02170577	X			X
ENSG00000135250	SRPK2	cg02747390		X		X
ENSG00000135250	SRPK2	cg23309631	X			X
ENSG00000073849	ST6GAL1					X
ENSG00000115415	STAT1	cg19881581		X	X
ENSG00000126561	STAT5A				X
ENSG00000007866	TEAD3				X
ENSG00000197905	TEAD4	cg27654846	X		X
ENSG00000197905	TEAD4	cg19148362	X		X
ENSG00000138336	TET1					X
ENSG00000108064	TFAM					X
ENSG00000137801	THBS1				X
ENSG00000066056	TIE1	cg01095482	X		X
ENSG00000111602	TIMELESS					X
ENSG00000035862	TIMP2	cg26017754	X		X
ENSG00000035862	TIMP2	cg00961940	X		X
ENSG00000035862	TIMP2	cg06233930	X		X
ENSG00000198586	TLK1					X
ENSG00000145779	TNFAIP8					X
ENSG00000006327	TNFRSF12A				X
ENSG00000121858	TNFSF10				X
ENSG00000131747	TOP2A					X
ENSG00000100038	TOP3B				X
ENSG00000078900	TP73	cg26105278	X		X
ENSG00000133112	TPT1					X
ENSG00000067445	TRO				X
ENSG00000077152	UBE2T					X
ENSG00000076248	UNG	cg12444710	X			X
ENSG00000105176	URI1					X
ENSG00000162607	USP1					X
ENSG00000058056	USP13					X
ENSG00000118369	USP35	cg09176233	X		X
ENSG00000118369	USP35	cg12465586	X		X
ENSG00000112715	VEGFA				X
ENSG00000026025	VIM					X
ENSG00000198373	WWP2					X
ENSG00000132530	XAF1	cg23571857	X		X
ENSG00000132530	XAF1	cg04290620	X		X
ENSG00000101966	XIAP					X
ENSG00000082898	XPO1					X
ENSG00000073050	XRCC1					X
ENSG00000079246	XRCC5					X
ENSG00000196419	XRCC6					X
ENSG00000137693	YAP1					X
ENSG00000065978	YBX1					X
ENSG00000134308	YWHAQ					X
ENSG00000164924	YWHAZ					X
ENSG00000100811	YY1					X
ENSG00000148516	ZEB1					X
